# Supplementary material for: Priming with FGF2 stimulates human dental pulp cells to promote axonal regeneration and locomotor function recovery after spinal cord injury
Source: Sci Rep. 2017 Oct 18;7:13500. doi: 10.1038/s41598-017-13373-5 (PMC5647367; doi:10.1038/s41598-017-13373-5)
Supplement: Supplementary file 1 — Supplemental Information [file 41598_2017_13373_MOESM1_ESM.pdf]

## **Priming with FGF2 stimulates human dental pulp cells to promote axonal regeneration and locomotor function recovery after spinal cord injury**

Kosuke Nagashima<sup>1†</sup>, Takahiro Miwa<sup>1†</sup>, Hitomi Soumiya<sup>1†</sup>, Daisuke Ushiro<sup>1</sup>, Tomoko Takeda-Kawaguchi<sup>2</sup>, Naritaka Tamaoki<sup>2,3</sup>, Saho Ishiguro<sup>1</sup>, Yumi Sato<sup>1</sup>, Kei Miyamoto<sup>4,5</sup>, Takatoshi Ohno<sup>4,6</sup>, Masatake Osawa<sup>7</sup>, Takahiro Kunisada<sup>8</sup>, Toshiyuki Shibata<sup>2</sup>, Ken-ichi Tezuka<sup>8</sup>, Shoei Furukawa<sup>1</sup>, Hidefumi Fukumitsu<sup>1\*</sup>

<sup>1</sup>Laboratory of Molecular Biology, Department of Biofunctional Analysis, Gifu Pharmaceutical University, 1-25-4 Daigakunishi, Gifu 501-1196, Japan

<sup>2</sup>Department of Oral and Maxillofacial Science, Gifu University Graduate School of Medicine, 1-1 Yanagido, Gifu 501-1194, Japan

<sup>3</sup>Current address: National Cancer Institute, National Institutes of Health (NIH), Bethesda, Maryland 20892, USA.

<sup>4</sup>Department of Orthopaedic Surgery, Gifu University Graduate School of Medicine, 1-1 Yanagido, Gifu 501-1194, Japan

<sup>5</sup>Current address: Department of Orthopaedic Surgery and Spine Center, Gifu Municipal Hospital, 7-1 Kashima, Gifu 500-8323, Japan

<sup>6</sup>Current address: Department of Orthopaedic Surgery, Gifu Red Cross Hospital, 3-36 Iwakura, Gifu 502-0844, Japan

<sup>7</sup>Department of Regeneration Technology, Gifu University Graduate School of Medicine, 1-1 Yanagido, Gifu 501-1194, Japan

<sup>8</sup>Department of Tissue and Organ Development, Gifu University Graduate School of Medicine, 1-1 Yanagido, Gifu 501-1194, Japan

\*Correspondence should be addressed to: Dr. Hidefumi Fukumitsu, Laboratory of Molecular Biology, Department of Biofunctional Analysis, Gifu Pharmaceutical University, 1-25-4 Daigakunishi, Gifu 501-1196, Japan; Email: hfukumi@gifu-pu.ac.jp.

## *Materials and Methods*

### *Preparation of the medium conditioned by DPCs*

At the 6th passage, the DPC-S and the DPC-FS were seeded onto 6 cm dishes coated with Cellmatrix Type IP (Nitta Gelatin Inc), at a density of  $5 \times 10^5$  cells per dish and cultured in the 10% FBS- $\pm$ MEM supplemented without or with 10 ng/mL of FGF2, respectively. After 2 DIV, the cells were rinsed twice with PBS and the medium was replaced with neuronal culture medium without B27 supplement (Neurobasal medium [Invitrogen] containing 0.5 mM L-glutamine, and 100 U/ml penicillin). After 2 DIV, the medium was collected and filtered through a sterile 0.45  $\mu$ m pore-size membrane filter (DISMIC-25, Advantec, Tokyo, Japan). The medium was used as conditioned medium for neuron morphological analysis.

### *Isolation and culture of mouse cortical neurons and morphological analysis*

Cortical neurons were prepared from cerebral cortices of embryonic day 15.5 mice and cultured as described previously.<sup>37</sup> In brief, embryos were collected removed from timed-pregnant ddY mice after killed and their cortices were dissected in L-15 medium (Sigma-Aldrich). The cortices were incubated in L-15 medium containing 0.25% trypsin and 0.1% DNase for 15 min at 37°C. After incubation, the digestion was stopped with FBS (HyClone, Thermo Fisher Scientific, Logan, UT, USA), and mechanically dissociated by pipette trituration in DMEM/F-12 (Sigma-Aldrich) containing 10% FBS. The cells were seeded onto round 13 mm coverslips (Matsunami Glass) coated with 0.05 mg/mL poly-L-ornithin (Sigma-Aldrich) in culture 24-wells plates at density of  $5 \times 10^4$  cells per well. After cell attachment, the medium was replaced by culture medium (Neurobasal medium [Invitrogen] with 2% B27 supplement

[Invitrogen], 0.5 mM L-glutamine, and 100 U/ml penicillin) with lenti-GFP ( $2.0 \times 10^5$  transduction units) under humidified conditions in 95% air and 5% CO<sub>2</sub> at 37°C. After 2 DIV, the medium was replaced with the DPC-cultured medium. The cortical neurons were incubated from 2 to 4 DIV and were processed for immunostaining and morphological analysis.

For morphological analysis, the cultured cortical neurons were immunostained and then processed using a confocal laser microscope (LSM 710; Carl Zeiss) as described previously.<sup>37</sup> Sholl analysis<sup>2</sup> with slight modification was performed for evaluating neuron morphology. In brief, circles with radii of 50 and 100  $\mu$ m were centered on the cell body, respectively. Then, the number of intersections with both MAP2 and GFP double-positive neurites was recorded. All the measured neurites started at the cell body.

#### *Membrane-based human growth factor antibody array and ELISA*

At the sixth passage, the DPC-S and the DPC-FS cells were seeded onto Cellmatrix Type IP-coated 6-cm dishes at a density of  $1 \times 10^6$  cells per dish and cultured in 10% FBS- $\pm$ MEM without FGF2. The next day, cells were rinsed twice with PBS and cultured in 2 mL of fresh 10% FBS- $\pm$ MEM for 2 days. For the microarray, a human growth factor antibody array was purchased from Abcam (ab134002). The cells were harvested with 500  $\mu$ L of lysis buffer, and cell lysates were prepared for use in the microarray assay, which was performed according to the manufacturer's instructions. Briefly, membranes were incubated with 1 $\times$  blocking buffer at r.t. for 30 min, followed by overnight individual incubation at 4°C in 1 mL of the lysates from the DPC-S and DPC-FS cells. After washing and incubation with biotin-conjugated anti-cytokine

antibodies at 4°C overnight, the membranes were again washed and then incubated with horseradish peroxidase-streptavidin at 4°C overnight. After washing, the membranes were incubated with the provided detection buffer, and signals were imaged using an LAS3000 mini-CCD camera (Fuji Film, Tokyo Japan).

The amount of BDNF in the cell culture medium and the DPC lysates was measured by a commercial ELISA kit (Promega, Madison, WI, USA) according to the manufacturer's instructions. Briefly, after the cells ( $1 \times 10^6$  cells per 6-cm dish) were cultured in 2 ml of fresh 10% FBS-±MEM for 2 days, cell lysates were harvested with 150 µl of lysis buffer. The cell lysates (diluted 1/4) and the undiluted culture medium were used as samples, which were tested at least in duplicate ( $n = 4-5$ ).

#### *Exposure to H<sub>2</sub>O<sub>2</sub>, western blot analysis, and immunocytochemistry*

The DPCs were plated at  $4 \times 10^5$  cells/6-cm dish for western blotting, and at  $3 \times 10^4$  cells/cover slip coated with Cellmatrix Type IP for immunocytochemistry, in 24-well dishes. They were cultured for 2 days, and the medium was changed daily. The DPCs were then washed twice with PBS and exposed to fresh 10% FBS-±MEM with 0.3–0.5 mM H<sub>2</sub>O<sub>2</sub> for 0, 6, and 24 h. A concentration of H<sub>2</sub>O<sub>2</sub> was used, which induced approximately 50% DPC-S cell death, and this varied between 0.3 and 0.5 mM depending on the batch of H<sub>2</sub>O<sub>2</sub>.

Western blotting was performed as previously reported<sup>37</sup>. Briefly, at the indicated time points after exposure to H<sub>2</sub>O<sub>2</sub>, DPCs were washed with 10 mM Tris-HCl buffer (pH 8.0) containing 150 mM NaCl and then lysed with 200 µl of 20 mM Tris-HCl buffer (pH 7.2) containing 150 mM NaCl, several detergents, and protein inhibitors. The cell lysates were centrifuged, and the protein concentration of each

supernatant was determined with a BCA Protein Assay Kit (Pierce, Rockford, IL). Each sample (for  $\beta$ -actin, 5  $\mu$ g; for FGF2, GDNF, and HGF, 10  $\mu$ g; and for BDNF, 18  $\mu$ g of protein/lane) was subjected to SDS polyacrylamide gel electrophoresis (PAGE; for BDNF, FGF2, and GDNF, 14%; for HGF and  $\beta$ -actin, 10%). Proteins were transferred to a polyvinylidene fluoride membrane and blocked with 5% skim milk (Morinaga Milk Products, Tokyo, Japan). Next, the membranes were incubated with primary antibodies (anti-BDNF, 1:1000, Abcam; anti-FGF2, 1:1000, R&D Systems; anti-GDNF, 1:1000, R&D Systems; and anti-HGF antibody, 1:1000, R&D Systems) at 4°C overnight, washed, and then incubated with alkaline phosphatase-conjugated secondary antibody (Promega) at r.t. for 1 hr. Finally, the protein bands were developed with nitroblue tetrazolium and 5-bromo-4-chloro-3-indoryl phosphate p-toluidine salt.

At the indicated time points after exposure to  $H_2O_2$ , the DPCs were fixed with 4% PFA solution, and immunocytochemistry was performed as described above.

Supplemental Table S1. Primer sets used in this study

| Gene  | Forward                      | Reverse                        |
|-------|------------------------------|--------------------------------|
| BDNF  | 52TCTCGACTGGAGGACCACACTC-32  | 52CCAACCTGCTCCAGGCTAATCC-32    |
| NT3   | 52AACGCGATGTAAGGAAGCCAGG-32  | 52GCTCGGACGTAGGTTTGGGATG-32    |
| GDNF  | 52TGCAGCTGAGACAACGTACGAC-32  | 52TCATCAAAGGCGATGGGTCTGC-32    |
| VEGF  | 52CTCCGAAACCATGAACTTTCTGC-32 | 52TCGTGATGATTCTGCCCTCCTC-32    |
| GAPDH | 52CCGATTTCTCCTCCGGGTGATG-32  | 52ACCATGTAGTTGAGGTCAATGAAGG-32 |

**a**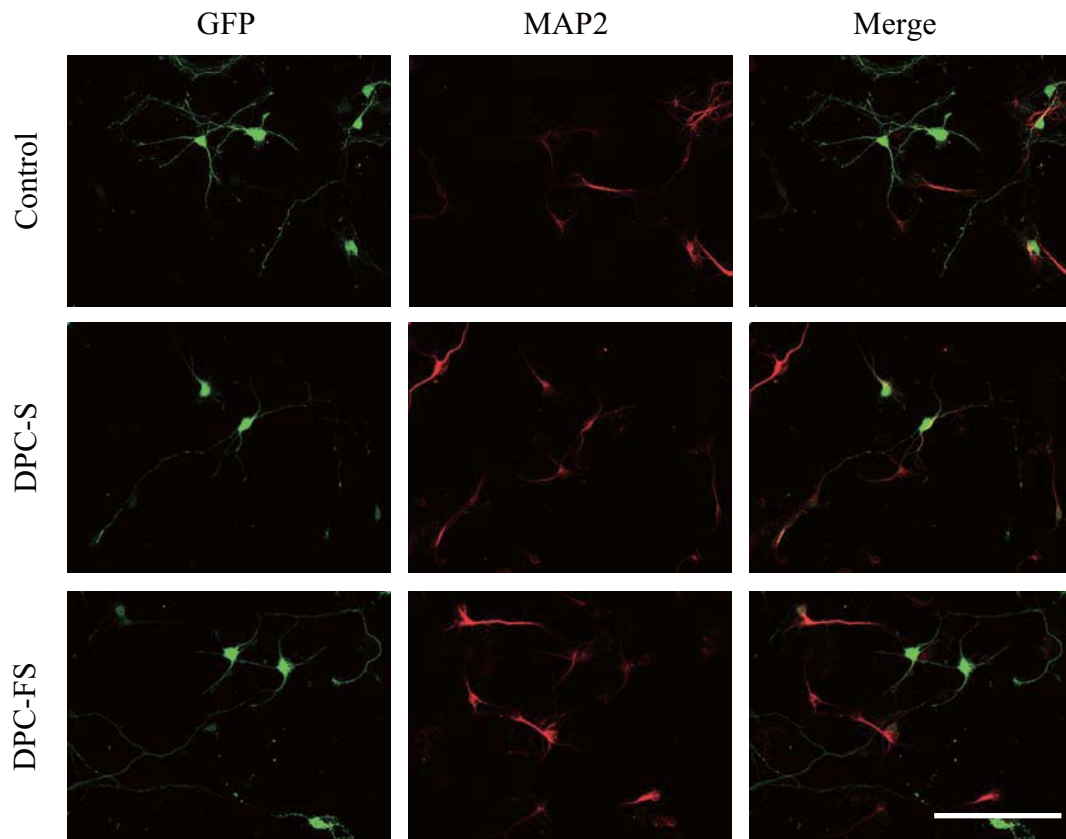**b**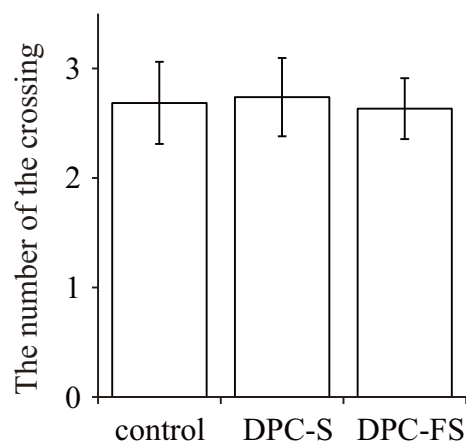**c**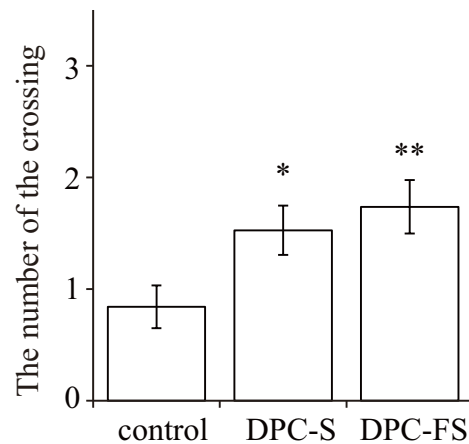

**Supplementary Figure S1. Effect of DPC-conditioned medium on the neurite extension in cortical neurons.** **a.** Fluorescence photomicrographs of mouse cortical neurons immunostained with anti-GFP and anti-MAP2 antibodies at 2 days after lentivirus-mediated GFP gene transfer in medium unconditioned or conditioned by DPC-S or DPC-FS. **b, c.** Sholl analysis. Values are expressed as the mean  $\pm$  SE. Significant differences between the two groups were determined by one-way ANOVA post hoc with Tukey' s multiple comparison test. \* $p < 0.05$  and \*\* $p < 0.01$ , respectively;  $n = 19$ . Note that the effect of conditioned medium was observed at a distance over 100  $\mu\text{m}$  (**c**) but not 50  $\mu\text{m}$  (**b**) from the soma. However, the effect on neurite extension was comparable between the medium conditioned by DPC-S and DPC-FS.

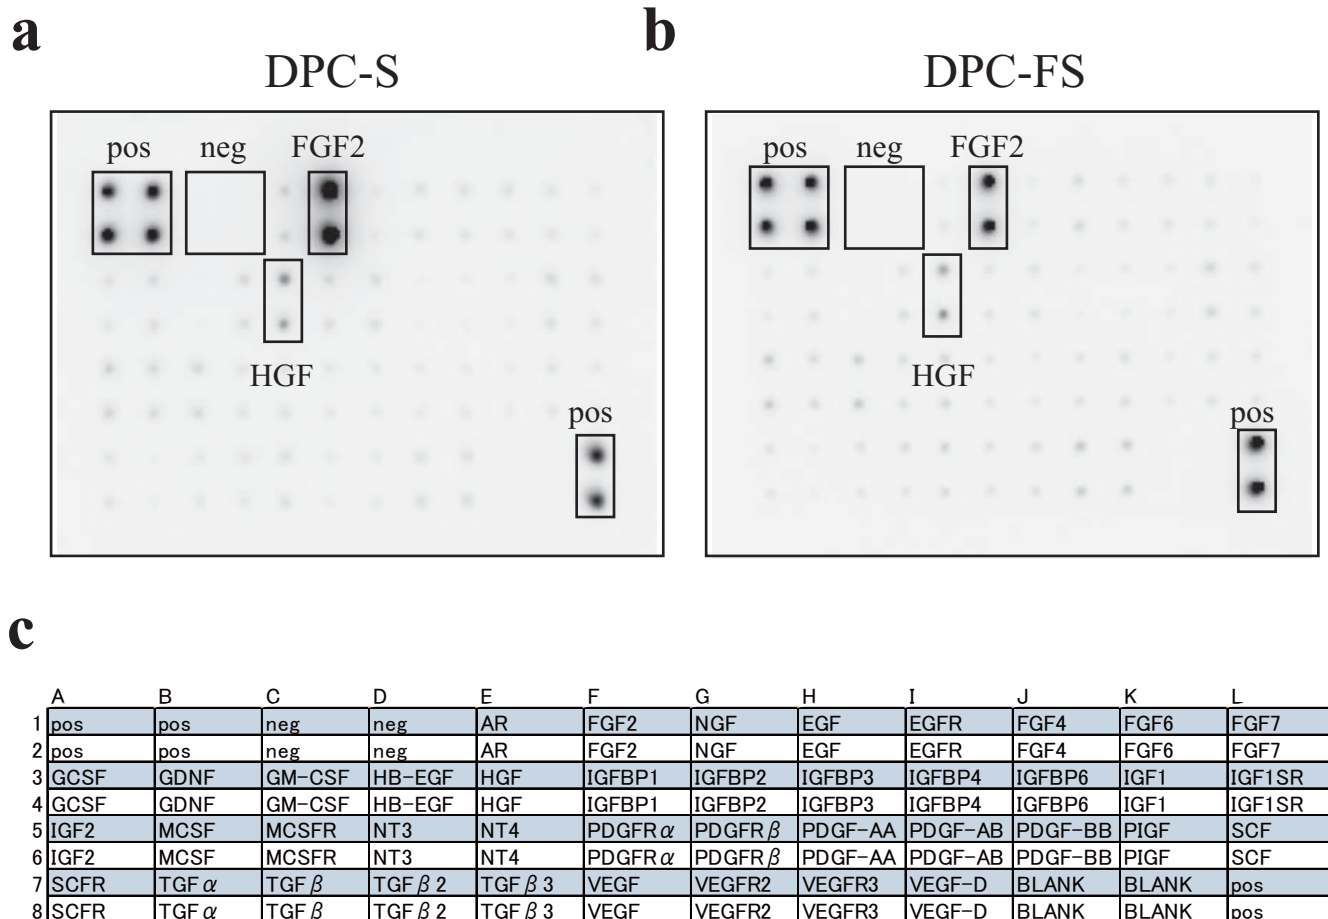

**Supplementary Figure S2. Growth factor antibody array.** Lysates from DPC-S (**a**) and DPC-FS (**b**) cells were incubated with a membrane containing 41 antibodies, with each antibody recognizing an individual growth factor. **c.** The localization of the antibodies spotted on a human growth factor antibody array.

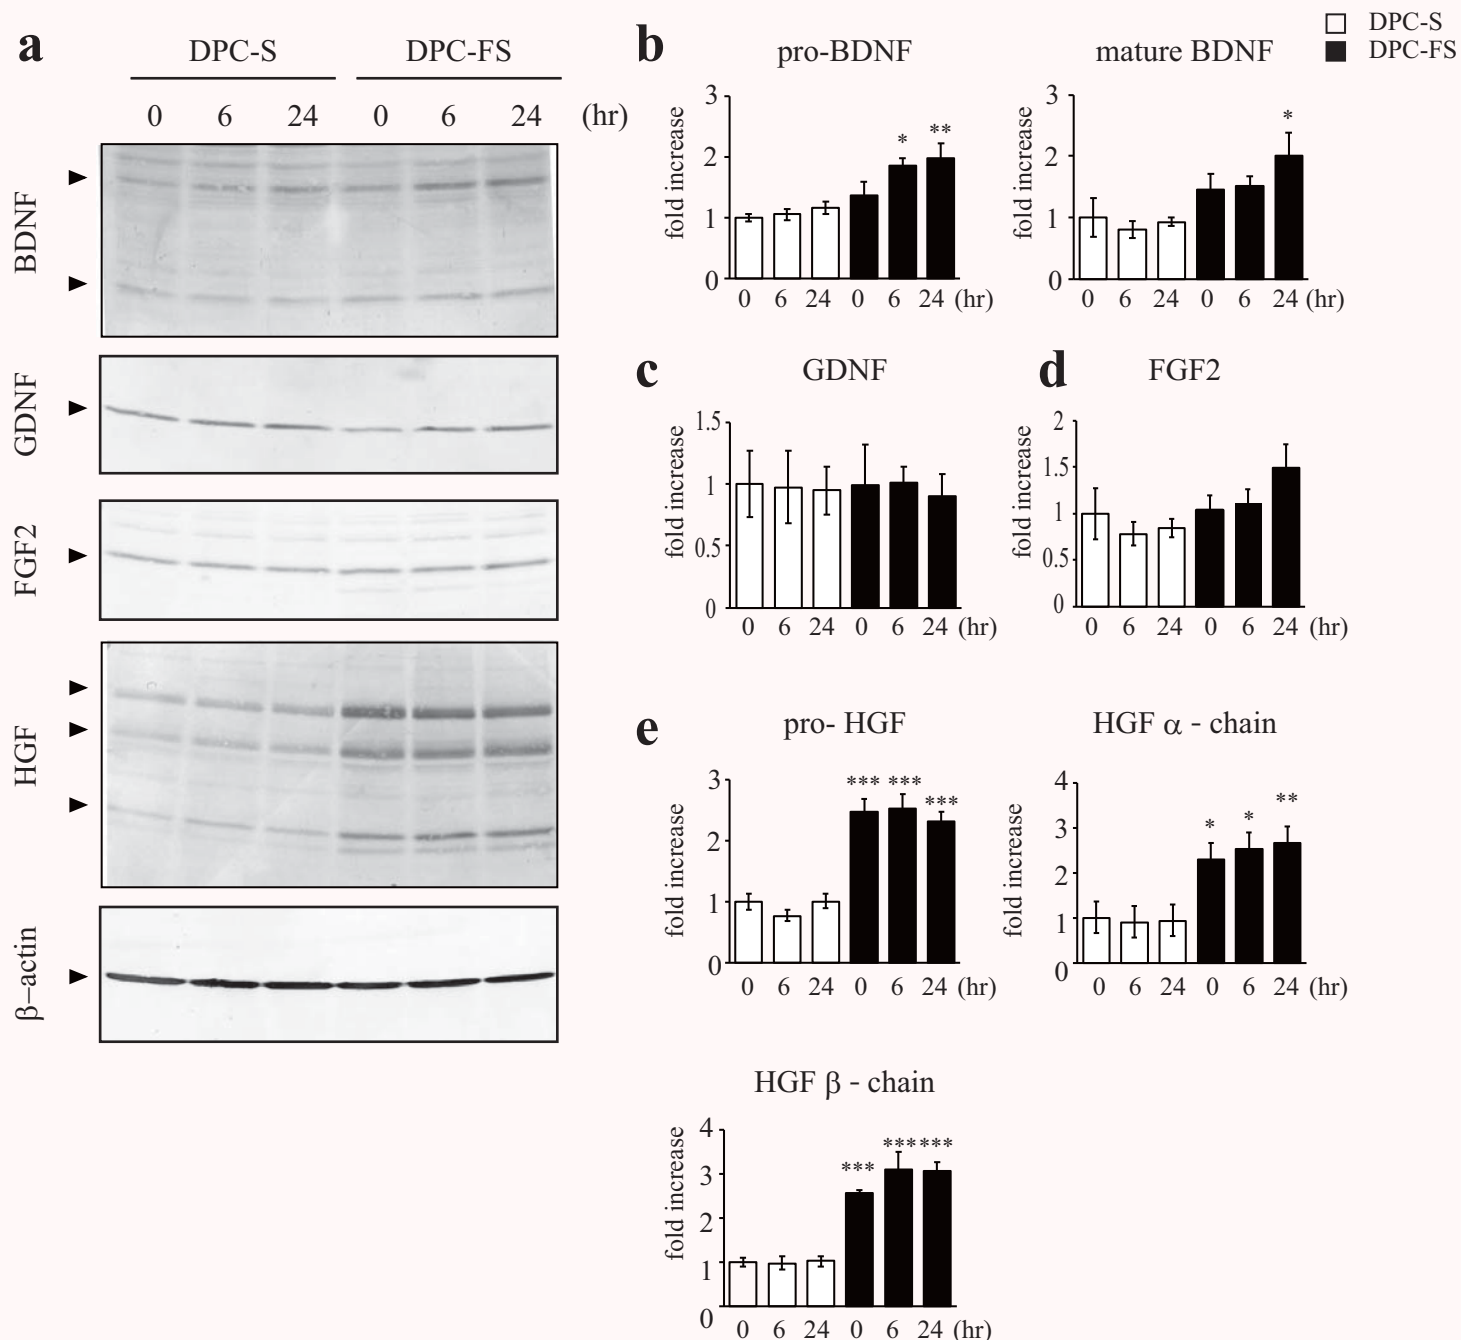

**Supplementary Figure S3. Production of neurotrophic factors by the DPCs after exposure to 0.3 mM H<sub>2</sub>O<sub>2</sub>.** **a.** Cell lysates from DPC-S and DPC-FS were subjected to PAGE and transferred onto membranes for western blotting with anti-BDNF, anti-FGF2, anti-GDNF, anti-HGF, and anti-β-actin antibodies. **b–e.** The intensity of the target bands (indicated by arrowheads in **a**) for each neurotrophic factor was densitometrically quantified, and the ratio of the intensity of each target protein/β-actin was expressed as a fold increase of the average value of individual target bands after exposure to H<sub>2</sub>O<sub>2</sub> compared with at 0 hr. The neurotrophic factor target bands were as follows: **b.** BDNF and pro BDNF, at 14 and 30 kDa, respectively; **c.** GDNF, at 18 kDa; **d.** FGF2, at 18 kDa; **e.** pro-HGF and α- and β-chains of HGF, at 95, 60, and 34 kDa, respectively. The values are expressed as the mean ± SE (n = 5). Significant differences from the value of individual target bands at 0 h after exposure to H<sub>2</sub>O<sub>2</sub> were determined by one-way ANOVA followed by Tukey's test; \*p < 0.05, \*\*p < 0.01, and \*\*\*p < 0.001, respectively.

**a**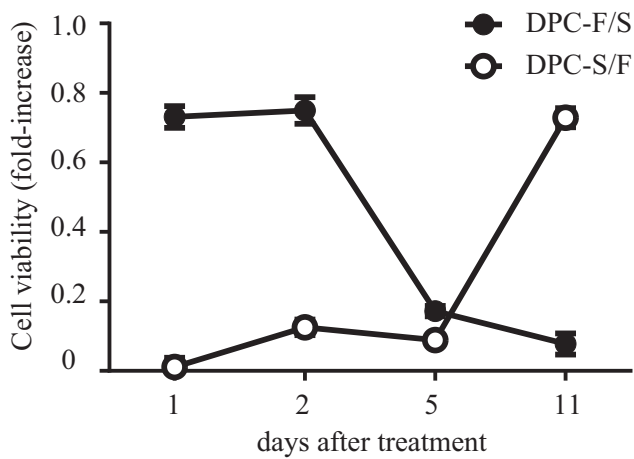**b**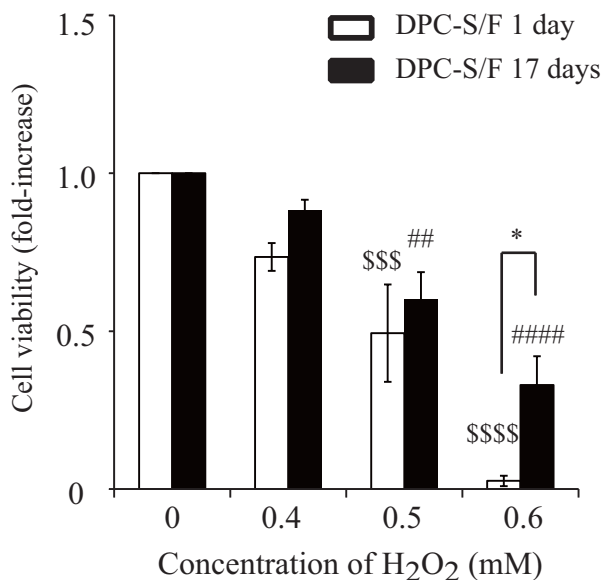**c**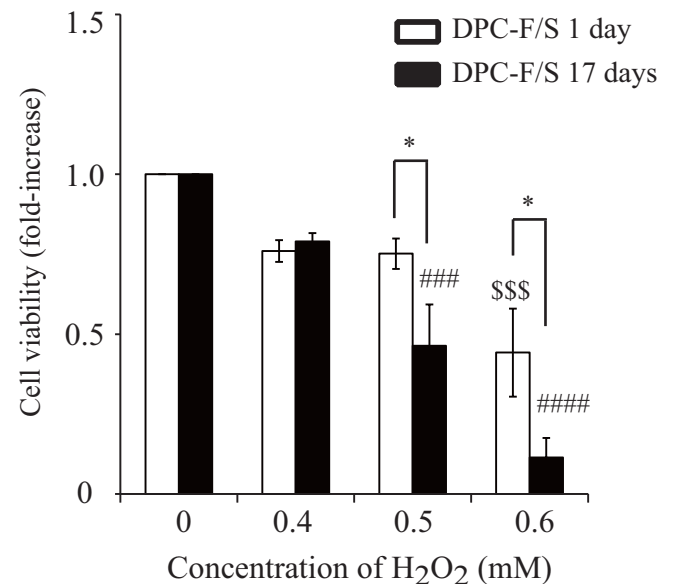

**Supplementary Figure S4. Time-course effect of FGF2 supplement and withdrawal on the H<sub>2</sub>O<sub>2</sub>-induced DPC death.** DPC-S and DPC-FS were independently cultured in medium supplement with and without FGF2, respectively (DPC-S/FS, and DPC-S/FS). **a.** At the indicated days after cultivation, the DPCs were exposed to 0.5 mM H<sub>2</sub>O<sub>2</sub> for 24 hrs, followed by MTT assay. **b.** On days 1 and 17 after cultivation, the DPCs were exposed to H<sub>2</sub>O<sub>2</sub> at various concentrations (0, 0.4, 0.5, and 0.6 mM) for 24 hrs, followed by MTT assay. The ratios of the absorbance values for the DPCs exposed to H<sub>2</sub>O<sub>2</sub> were calculated relative to controls (H<sub>2</sub>O<sub>2</sub>-untreated DPCs). The values are expressed as the mean  $\pm$  SE. Significant differences between the two groups were determined by two-way ANOVA post hoc with Tukey's multiple comparison test. \* $p < 0.05$  vs DPC-S treated with H<sub>2</sub>O<sub>2</sub> at the same concentration; \$\$\$ $p < 0.005$ , \$\$\$ $p < 0.001$  vs DPC-S/FS day 1 or DPC-FS/S day 1 treated with 0 mM H<sub>2</sub>O<sub>2</sub>; and ## $p < 0.01$ , #### $p < 0.001$  vs DPC-S/FS day 17 or DPC-FS/S day 17 treated with 0 mM H<sub>2</sub>O<sub>2</sub>, respectively;  $n = 4$ .

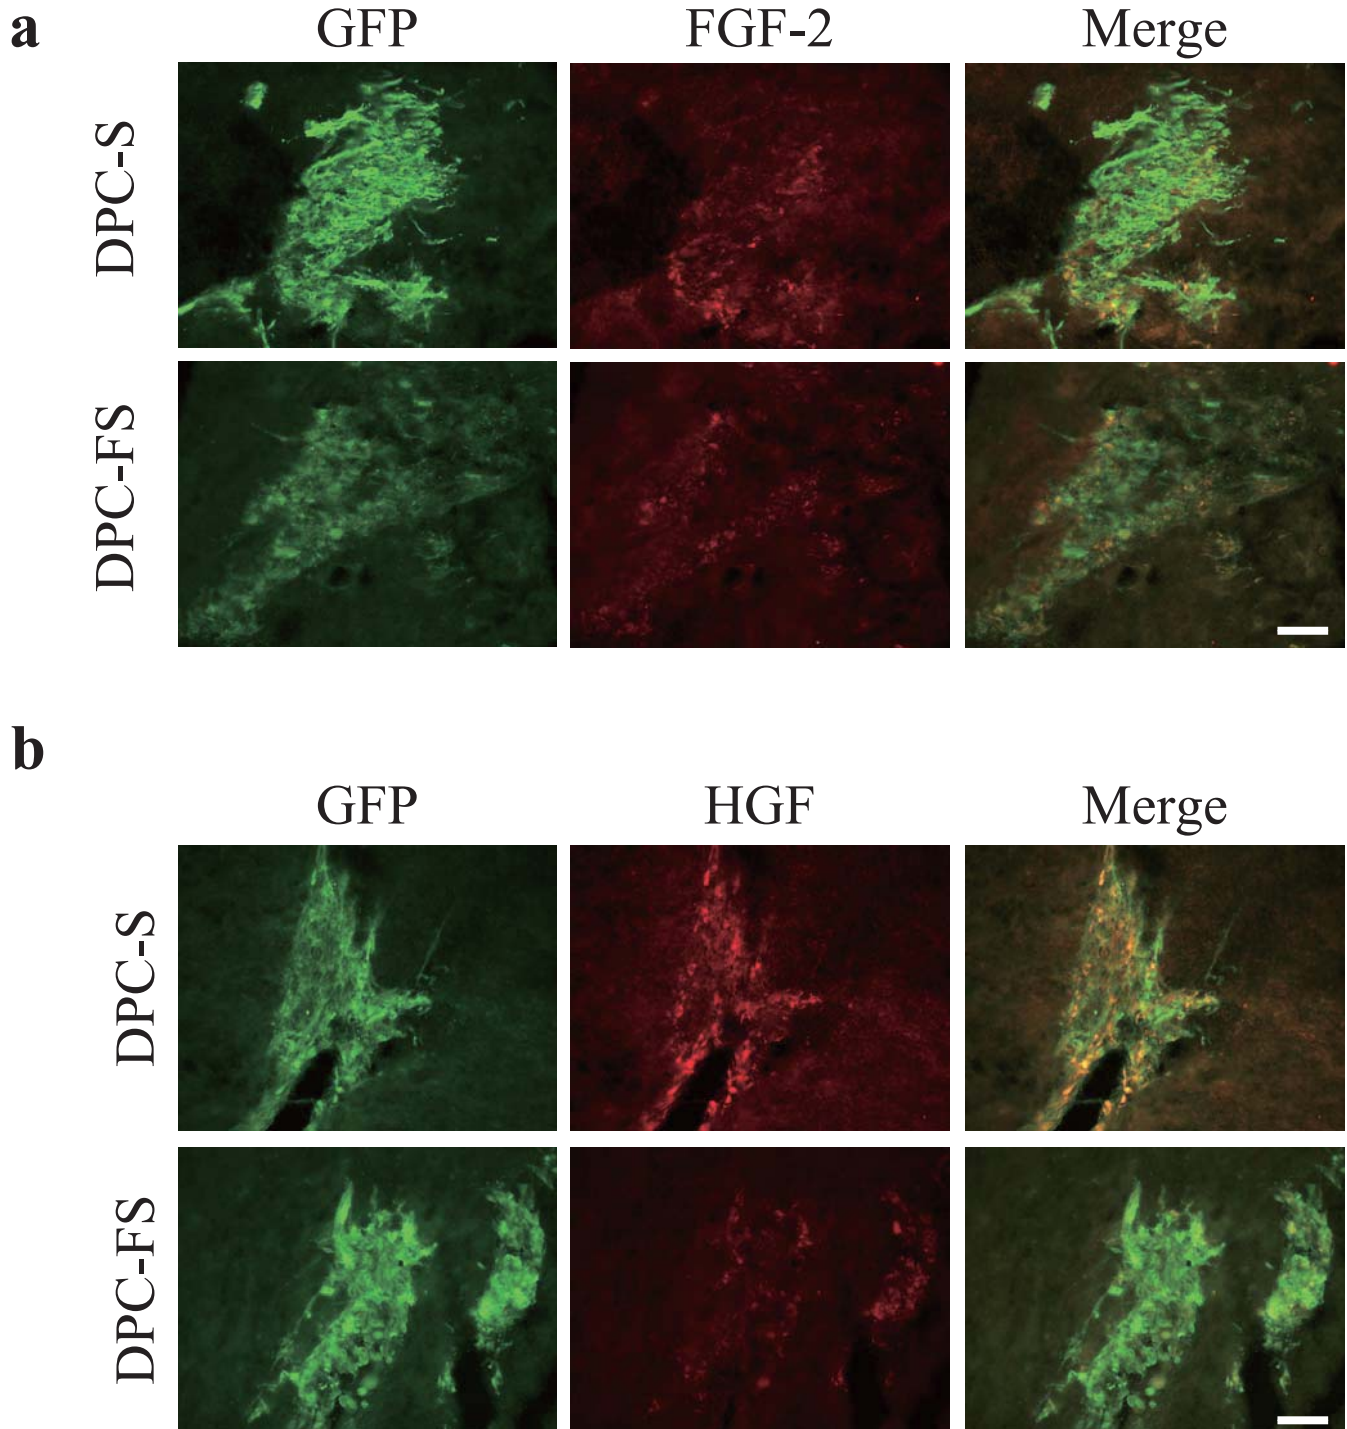

**Supplementary Figure S5. Production of neurotrophic factors by DPCs in the spinal cord injury site at 24 hr after transplantation.** Fluorescence photomicrographs of sagittal spinal cord sections with SCI/DPC-S or SCI/DPC-FS transplantation. Sections immunostained for GFP (green) and neurotrophic factors (red) were merged. **a.** FGF2 and **b.** HGF. Note that substantial numbers of GFP-positive DPC-S and DPC-FS cells produced FGF2 and HGF. Scale bar, 100  $\mu$ m.

**a**

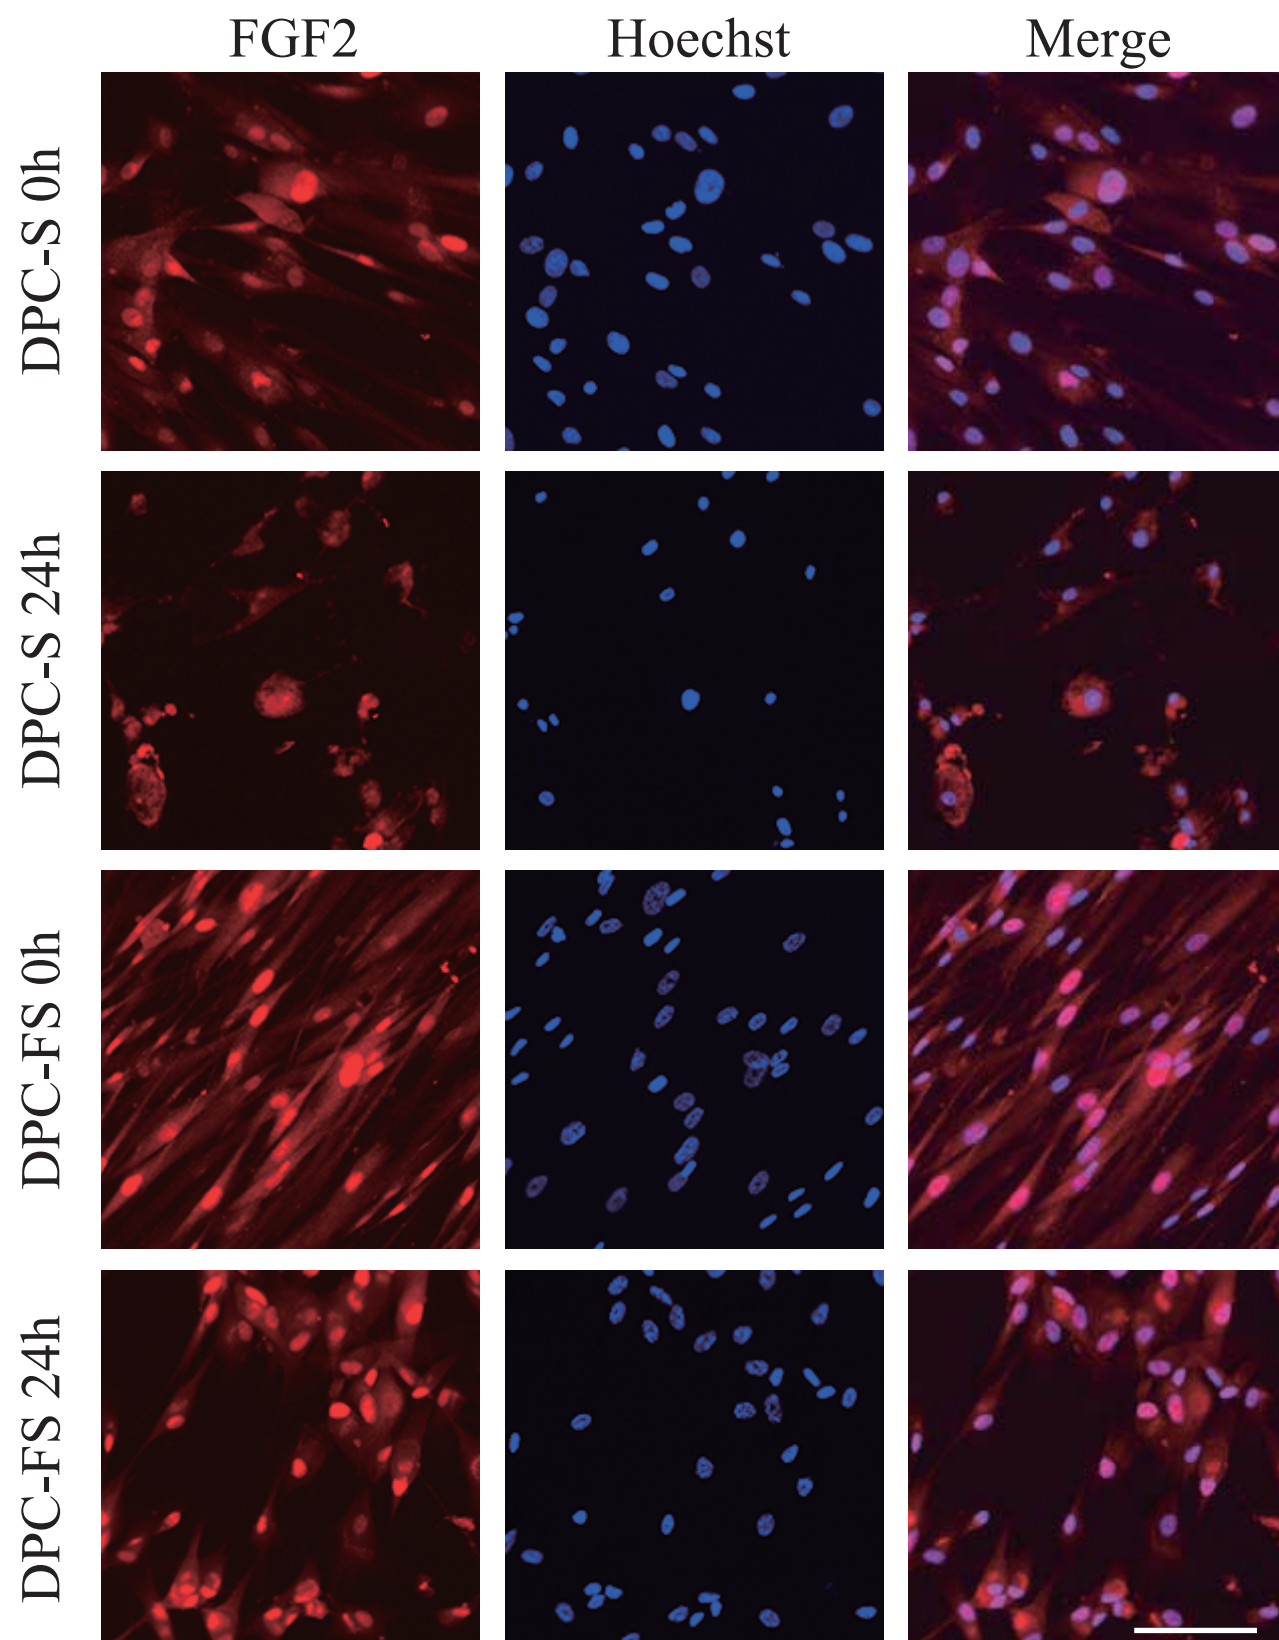

**b**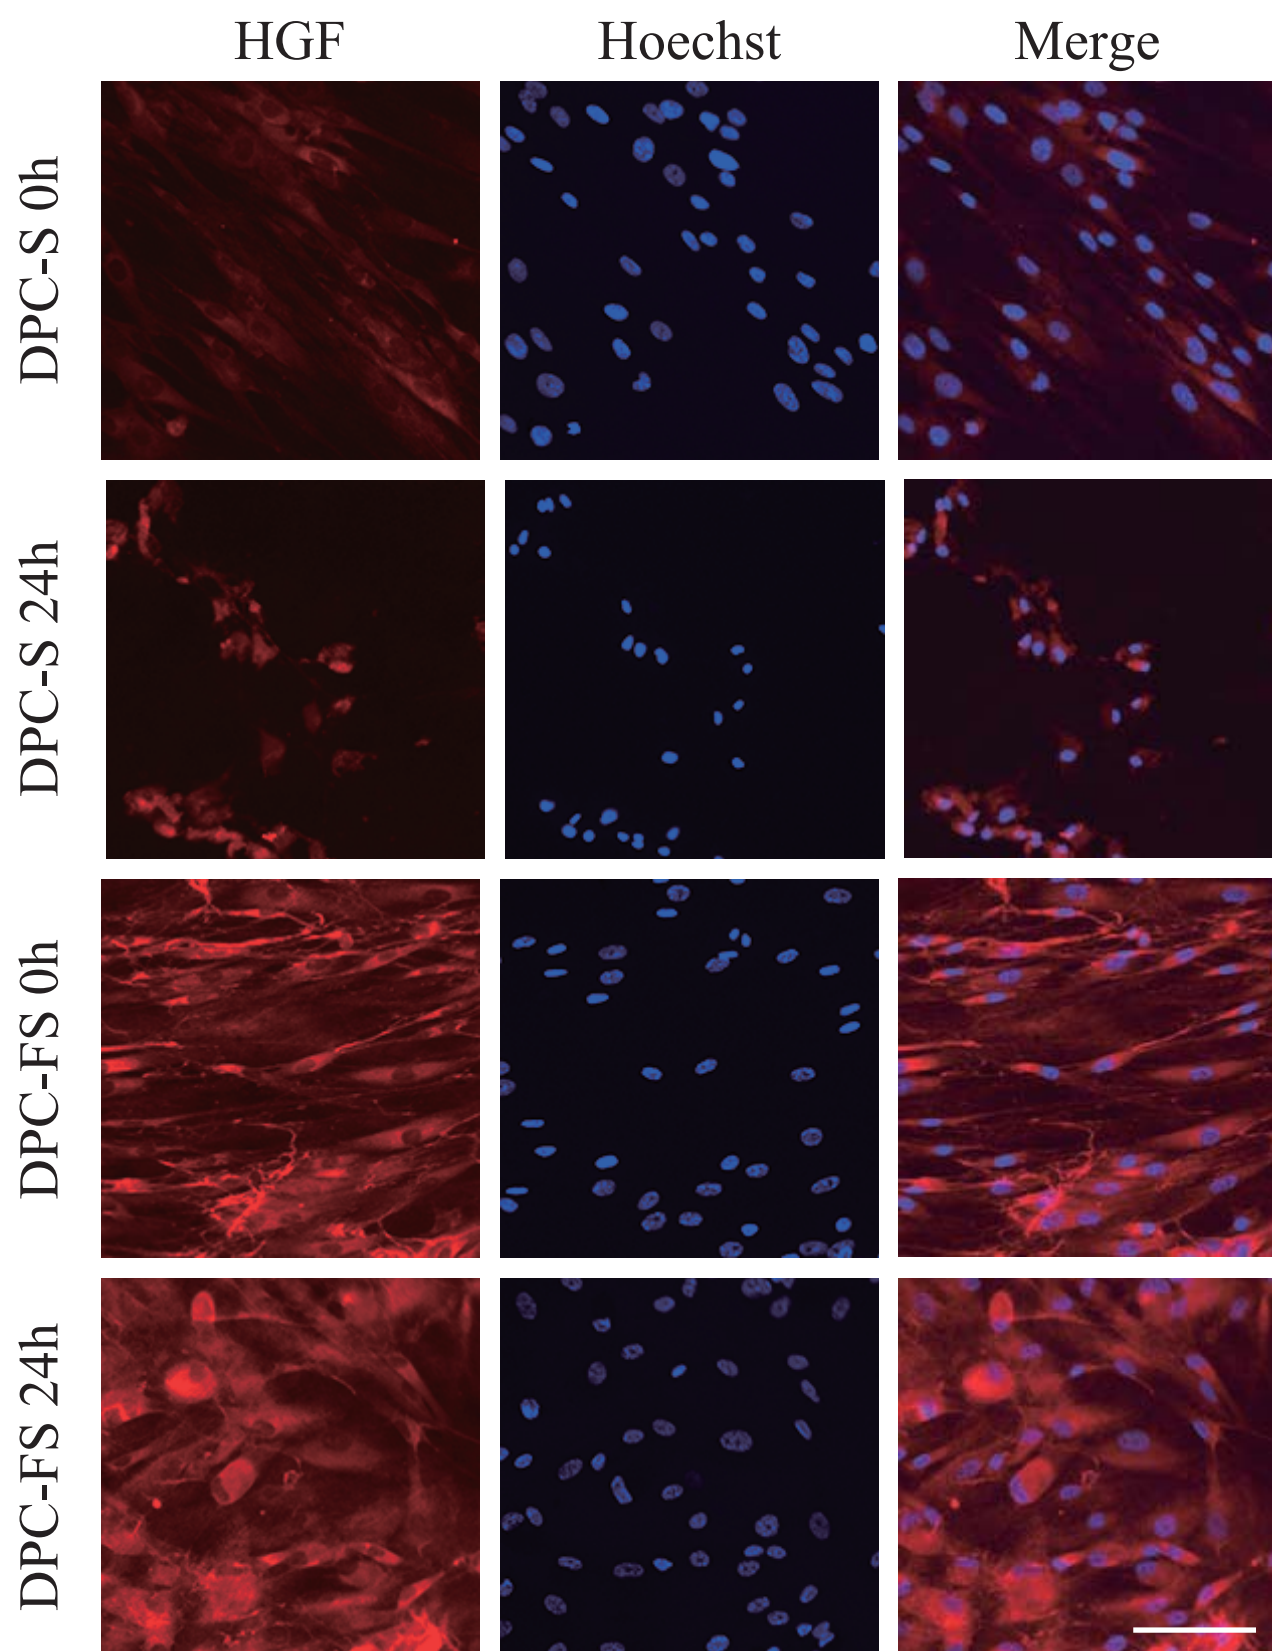

**Supplementary Figure S6. Production of neurotrophic factors by cultured DPCs at 0 and 24 h after exposure to 0.3 mM H<sub>2</sub>O<sub>2</sub>.** Cultured DPCs were characterized immunohistochemically using antibodies against FGF2 (red; a) or HGF (red; b). Nuclei were stained with Hoechst 33342 (blue). Note that the cell density of DPC-S was reduced at 24 h after exposure to H<sub>2</sub>O<sub>2</sub>; however, the production of FGF2 and HGF was not altered after H<sub>2</sub>O<sub>2</sub> treatment. Scale bar, 100  $\mu$ m.
